# Supplementary material for: Robot-Assisted Maxillary Positioning in Orthognathic Surgery: A Feasibility and Accuracy Evaluation
Source: MDPI journal article supplement (doi:10.3390/jcm10122596), 2021-06-11
Supplement: s1 [file s1]

**Table S1.** The planned and actual movements of the maxilla depending on each surgical plan.

|                                                | Planned Movement (mm) |              |              | Actual Movement (mm) |              |              |
|------------------------------------------------|-----------------------|--------------|--------------|----------------------|--------------|--------------|
|                                                | x                     | y            | z            | x                    | y            | z            |
| <b>Bodily shift</b>                            |                       |              |              |                      |              |              |
| <i>Advancement by 3 mm and downward by 2mm</i> |                       |              |              |                      |              |              |
| #11                                            | 0.00 ± 0.00           | -3.00 ± 0.00 | -2.00 ± 0.00 | 0.30 ± 0.67          | -2.72 ± 0.50 | -2.26 ± 1.09 |
| #13                                            | 0.00 ± 0.00           | -3.00 ± 0.00 | -2.00 ± 0.00 | 0.32 ± 0.58          | -2.67 ± 0.70 | -2.32 ± 0.87 |
| #23                                            | 0.00 ± 0.00           | -3.00 ± 0.00 | -2.00 ± 0.00 | 0.32 ± 0.58          | -2.76 ± 0.29 | -1.98 ± 0.74 |
| #16                                            | 0.00 ± 0.00           | -3.00 ± 0.00 | -2.00 ± 0.00 | 0.31 ± 0.45          | -2.70 ± 0.61 | -2.18 ± 0.48 |
| #26                                            | 0.00 ± 0.00           | -3.00 ± 0.00 | -2.00 ± 0.00 | 0.32 ± 0.45          | -2.84 ± 0.15 | -1.68 ± 0.42 |
| <i>Bodily shift to the right by 3 mm</i>       |                       |              |              |                      |              |              |
| #11                                            | -3.00 ± 0.00          | 0.00 ± 0.00  | 0.00 ± 0.00  | -3.02 ± 0.24         | 0.37 ± 0.53  | 0.21 ± 0.27  |
| #13                                            | -3.00 ± 0.00          | 0.00 ± 0.00  | 0.00 ± 0.00  | -3.03 ± 0.23         | 0.34 ± 0.50  | 0.22 ± 0.44  |
| #23                                            | -3.00 ± 0.00          | 0.00 ± 0.00  | 0.00 ± 0.00  | -3.03 ± 0.23         | 0.39 ± 0.54  | 0.25 ± 0.33  |
| #16                                            | -3.00 ± 0.00          | 0.00 ± 0.00  | 0.00 ± 0.00  | -3.06 ± 0.21         | 0.30 ± 0.43  | 0.28 ± 0.71  |
| #26                                            | -3.00 ± 0.00          | 0.00 ± 0.00  | 0.00 ± 0.00  | -3.07 ± 0.21         | 0.37 ± 0.45  | 0.31 ± 0.57  |
| <b>Rotation</b>                                |                       |              |              |                      |              |              |
| <i>Cant correction by 4mm</i>                  |                       |              |              |                      |              |              |
| #11                                            | 0.00 ± 0.00           | 0.00 ± 0.00  | 0.02 ± 0.05  | -0.58 ± 0.36         | -0.02 ± 0.34 | 0.33 ± 0.21  |
| #13                                            | 0.01 ± 0.05           | 0.00 ± 0.00  | 1.38 ± 0.05  | -0.59 ± 0.30         | -0.08 ± 0.45 | 1.85 ± 0.39  |
| #23                                            | -0.02 ± 0.07          | 0.00 ± 0.00  | -1.37 ± 0.04 | -0.64 ± 0.30         | 0.04 ± 0.26  | -1.08 ± 0.15 |
| #16                                            | 0.46 ± 0.18           | 0.00 ± 0.00  | 1.95 ± 0.04  | -0.15 ± 0.16         | -0.16 ± 0.59 | 2.59 ± 0.60  |
| #26                                            | 0.47 ± 0.19           | 0.00 ± 0.00  | -2.01 ± 0.05 | -0.16 ± 0.20         | 0.01 ± 0.27  | -1.64 ± 0.34 |
| <i>Posterior impaction by 3 mm</i>             |                       |              |              |                      |              |              |
| #11                                            | 0.00 ± 0.00           | 0.00 ± 0.00  | 0.00 ± 0.00  | 0.03 ± 0.59          | 0.06 ± 0.44  | 0.00 ± 0.21  |
| #13                                            | 0.00 ± 0.00           | -0.17 ± 0.16 | 1.00 ± 0.03  | 0.04 ± 0.70          | -0.08 ± 0.79 | 0.98 ± 0.16  |
| #23                                            | 0.00 ± 0.00           | -0.31 ± 0.10 | 1.14 ± 0.07  | 0.04 ± 0.71          | -0.28 ± 0.34 | 1.15 ± 0.09  |
| #16                                            | 0.00 ± 0.00           | -1.07 ± 0.18 | 3.00 ± 0.00  | 0.07 ± 0.92          | -0.98 ± 0.93 | 3.12 ± 0.10  |
| #26                                            | 0.00 ± 0.00           | -1.38 ± 0.19 | 3.16 ± 0.21  | 0.06 ± 0.93          | -1.39 ± 0.35 | 3.19 ± 0.19  |

Data are presented as mean ± standard deviation.
